1 **Epigenetic suppression of interferon lambda receptor expression leads to enhanced**  
2 **HuNoV replication *in vitro*.**

3  
4 Sabastine E. Arthur\*, Frédéric Sorgeloos\*<sup>#</sup>, Myra Hosmillo, and Ian G. Goodfellow<sup>#</sup>.

5  
6 Division of Virology, Department of Pathology, University of Cambridge, Addenbrooke's Hospital,  
7 Hills Road, Cambridge, CB2 0QQ, United Kingdom

8  
9 <sup>#</sup>Corresponding authors.

10 \* These authors contributed equally to this work.

11 Email: [ig299@cam.ac.uk](mailto:ig299@cam.ac.uk) , [frederic.sorgeloos@gmail.com](mailto:frederic.sorgeloos@gmail.com)

12  
13 **Keywords: Human norovirus replicon, microarray analysis, interferon lambda receptor**  
14 **(IFNL1), DNA methylation, epigenetic reprogramming.**

15  
16 **Running Title: Epigenetic reprogramming of norovirus harbouring cells**

17  
18 The authors declare no conflict of interests.

19

20

21 **Abstract**

22 Human norovirus (HuNoV) is the main cause of gastroenteritis worldwide yet no therapeutics are  
23 currently available. Here, we utilize a human norovirus replicon in human gastric tumor (HGT) cells  
24 to identify host factors involved in promoting or inhibiting HuNoV replication. We observed that an  
25 IFN-cured population of replicon-harboring HGT cells (HGT-cured) was enhanced in their ability to  
26 replicate transfected HuNoV RNA compared to parental HGT cells, suggesting that differential gene  
27 expression in HGT-cured cells created an environment favouring norovirus replication. Microarray  
28 analysis was used to identify genes differentially regulated in HGT-NV and HGT-cured compared to  
29 parental HGT cells. We found that the IFN lambda receptor alpha (IFNLR1) expression was highly  
30 reduced in HGT-NV and HGT-cured cells. All three cell lines responded to exogenous IFN- $\beta$  by  
31 inducing interferon stimulated genes (ISGs), however, HGT-NV and HGT-cured failed to respond to  
32 exogenous IFN- $\lambda$ . Inhibition of DNA methyltransferase activity with 5-aza-2'-deoxycytidine partially  
33 reactivated IFNLR1 expression in HGT-NV and IFN-cured cells suggesting that host adaptation  
34 occurred via epigenetic reprogramming. In line with this, ectopic expression of the IFN- $\lambda$  receptor  
35 alpha rescued HGT-NV and HGT-cured cells response to IFN- $\lambda$ . We conclude that type III IFN is  
36 important in inhibiting HuNoV replication in vitro and that the loss of IFNLR1 enhances replication  
37 of HuNoV. This study unravels for the first time epigenetic reprogramming of the interferon lambda  
38 receptor as a new mechanism of cellular adaptation during long-term RNA virus replication and  
39 shows that an endogenous level of interferon lambda signalling is able to control human norovirus  
40 replication.

41

42 **Importance**

43 Noroviruses are one of the most wide-spread causes of gastroenteritis yet we have no therapeutics for  
44 their control and we do not fully understand what cellular processes control viral replication. Recent  
45 work has highlighted the importance of type III interferon (IFN) responses in the restriction of viruses  
46 that infect the intestine. Here we analysed the adaptive changes required to support long term

47 replication of noroviruses in cell culture and found that the receptor for type III IFN is decreased in its  
48 expression. We confirmed that this decreased expression was driven by epigenetic modifications and  
49 that cells lacking the type III IFN receptor are more permissive for norovirus replication. This work  
50 provides new insights into key host-virus interactions required for the control noroviruses and opens  
51 potential novel avenues for their therapeutic control.

52

### 53 **Introduction**

54

55 With the introduction of the rotavirus vaccine, human norovirus (HuNoV) is now the main etiologic  
56 agent responsible for gastroenteritis worldwide (1–4). The disease, characterized by diarrhoea, nausea  
57 and vomiting is generally self-limiting in healthy adults. However, in immunocompromised, elderly  
58 patients and young children under the age of five, the disease can become chronic and sometimes lead  
59 to death mostly due to dehydration (5–9). Despite this and the profound economic burden of the  
60 disease (10), there are no therapeutics or licensed vaccines available.

61 Until the advent of the B lymphocyte-based and stem cell-derived human intestinal enteroid culture  
62 systems (11, 12), HuNoV research has been hampered by the lack of cell culture and small animal  
63 models recapitulating noroviral infection and pathogenesis. However, limitations in robustness, cost  
64 and labour intensity associated with both methods foreshadow that advances in HuNoV research still  
65 relies on the well-established murine norovirus (MNV) infection model and norovirus replicon  
66 systems (13, 14). These systems have been used to identify key host factors that impact the lifecycle  
67 of HuNoV, reviewed by Thorne and Goodfellow (15).

68 Contrary to the type I IFNs (IFN- $\alpha/\beta$ ) which were discovered more than an half century ago (16), type  
69 III interferons (IFN- $\lambda$ ) were discovered only little over a decade (17, 18). Although both cytokine  
70 families possess similar functions, a few but crucial differences exist in their biology. Notably, both  
71 cytokines signal through distinct heterodimeric receptors with type I IFN signalling through the  
72 interferon alpha/beta receptor (IFNAR) composed of the IFNAR1 and IFNAR2 subunits and type III

73 IFN through the interferon lambda receptor (IFNLR) which consists of the interferon lambda receptor  
74 1 (IFNLR1) and interleukin 10 receptor beta (IL10RB) subunits. Unlike the type I IFN receptor that is  
75 expressed on most cell types, expression of the IFNLR1 subunit is restricted to cells of the mucosal  
76 epithelium, neutrophils and human hepatocytes (19–21). Although the immune cells of the blood were  
77 also shown to express the IFNLR1 subunit, the receptor has been reported to lack the ability to  
78 respond to IFN- $\lambda$  (22).

79 Expression of type I and III interferons is regulated at the transcriptional level and relies on the  
80 recognition of conserved pathogen-associated molecular patterns (PAMPs). Detection of these  
81 molecular signatures by extracellular and intracellular pattern recognition receptors triggers the  
82 coordinated activation of distinct signalling pathways responsible for the activation of IRF-3/7 and  
83 NF- $\kappa$ B transcription factors that are required for IFN gene transcription. Secreted IFN- $\lambda$  then binds to  
84 the IFNLR and is thought to activate the Janus kinase 1 and tyrosine kinase 2. Subsequently, recruited  
85 signal transducer and activator of transcription 1 (STAT1) and STAT2 are activated through  
86 phosphorylation leading to the expression of IFN stimulated genes (ISGs), some of which have direct  
87 antiviral activities (23). Interferon lambdas are important players in both innate and adaptive  
88 immunity and have profound antiviral effects on a variety of viruses (24–28). Expression of IFNLR1  
89 on epithelial cells of the small intestine and colon was shown to be important in IFN- $\lambda$ -mediated  
90 antiviral activity against persistent MNV and reovirus infection *in vivo* (29). Treatment of persistently  
91 infected mice lacking adaptive immune response (Rag1<sup>-/-</sup>) with IFN- $\lambda$  abolished viral replication,  
92 suggesting that IFN- $\lambda$  can cure persistent MNV infection in absence of adaptive immunity and this  
93 ability requires the expression of IFNLR1 (30). In line with this, the effect of antibiotics that inhibit  
94 persistent MNV infection in the gut has also been shown to be dependent on IFNLR1 expression as  
95 well as IRF3 and STAT1 transcription factors (31). It was observed that AG129 sentinel mice lacking  
96 the ability to respond to both IFN- $\alpha/\beta$  and IFN- $\gamma$  housed together with MNV-infected mice developed  
97 a diarrhoea-associated MNV infection. Overexpression of IFN- $\lambda$  in sentinel mice upregulated ISG  
98 expression, inhibited MNV replication in the small intestine and prevented them from being infected

99 when co-housed with MNV-infected mice (32). This article was submitted to an online preprint  
100 archive (33).

101

102

103

104 **Results**

105 **Generation and characterization of human cell lines bearing stable human norovirus replicons.**

106 To understand the influence of viral and host factors involved in HuNoV replication, we sought to  
107 generate several human cell lines stably replicating HuNoV RNA. To this end, BHK-21 cells were  
108 transfected with capped Norwalk replicon RNA harbouring a neomycin selection marker (14) and  
109 subjected to G418 selection 48 hours after transfection (Fig. 1A). Although the vast majority of the  
110 cells died within one week, individual cell colonies were observed and subjected to limiting dilution.  
111 A single high-expressing clone was selected and expanded to generate stable replicon-containing  
112 BHK-21 cells (BHK-NV). VPg-linked RNA extracted from these cells was transfected into HGT  
113 cells, a cell line of epithelial origin which was subsequently selected on the basis of their G418  
114 resistance in order to generate human norovirus replicon cells (HGT-NV). These HGT-NV cells were  
115 either collected as a population or subjected to limiting dilution to produce HGT-NV cell clones. The  
116 HGT-NV population was further passaged 16 times in the presence of IFN $\alpha$  at a concentration of  
117 1000 U/mL in the absence of G418 selection over an 8 weeks period leading to the generation of  
118 HGT-Cured cells. These cells were subsequently cultured in presence of G418 to observe their loss of  
119 resistance to G418 confirming the complete elimination of the replicon. Detection of HuNoV RNA by  
120 RT-qPCR analysis confirmed the presence of noroviral genomes in HGT-NV cells that were absent  
121 from HGT-Cured or parental HGT cells used as control (Fig. 1B). To confirm the presence of  
122 authentic steady-state replication of Norwalk RNA, cells were subjected to immunofluorescence  
123 analysis using monoclonal antibodies directed against dsRNA, a by-product assumed to be universally  
124 generated during viral replication (34, 35). As shown in Fig. 1C, punctate structures reminiscent of  
125 replication complexes were identified in HGT-NV cells while no signal above background levels was  
126 detected in HGT-Cured or in parental cell lines. Taken together these results suggest that HuNoV  
127 VPg-linked RNA successfully replicates in HGT cells and displays all the characteristics of a  
128 replication-competent RNA.

129 **Cured population of HGT-NV cells demonstrate enhanced HuNoV replication.**

130 Stable viral RNA replication under drug-mediated selection leads to an environment where on the one  
131 hand host cells face the selective pressure of the drug and, on the other hand, replicating RNA faces  
132 innate cellular responses aimed at inhibiting replication. This results in the establishment of a  
133 metastable equilibrium prone to adaptation from both cells and the replicating viral RNA. To test for  
134 the appearance of such adaptive mutation(s) in the replicon, VPg-linked RNA was extracted from  
135 BHK-NV and HGT-NV cells and subjected to consensus genome sequencing. Sequence analysis  
136 revealed that viral RNA originating from both BHK-NV and HGT-NV cells underwent many  
137 synonymous and non-synonymous genomic changes, suggesting the potential adaptation of HuNoV  
138 RNA to specific cellular environments (Supporting information Table 1). To test specifically for  
139 host cell adaptation, wild-type VPg-linked RNA extracted from BHK-NV cells was re-transfected in  
140 both HGT and HGT-Cured cell lines that were subsequently selected for 5 days with G418. As shown  
141 in Fig. 2A, HGT-Cured cells gave rise to a greater number of stable replicon colonies than parental  
142 HGT cells. To quantitatively confirm this observation, each cell line was transfected with wild-type  
143 VPg-linked RNA replicon and cells were harvested at various time points for RNA extraction and  
144 viral RNA quantification (Fig. 2B). From 5 days post transfection, the levels of Norwalk replicon  
145 RNA were significantly higher in HGT-Cured cells when compared to HGT cells. Noroviral RNA  
146 levels further increased at day 6 to yield a 15-fold difference between HGT-Cured and HGT cells.  
147 Quantification of transfected VPg-linked viral RNA at 6h post transfection revealed similar levels in  
148 both HGT and HGT-Cured cells suggesting that IFN treatment did not alter the ability of HGT-Cured  
149 cells to be transfected (data not shown). We thus concluded that HGT-Cured cells possess a greater  
150 degree of permissiveness to viral replication than parental HGT cells.

151 **An alteration in cellular environment is responsible for enhanced viral replication in HGT-**  
152 **Cured cells.**

153 Increased replication of HuNoV VPg-linked RNA in HGT-Cured cells suggests that these cells  
154 provide a better cellular environment compared to that of parental HGT cells. To get insights into the  
155 mechanism of this cell-derived HuNoV replicon permissiveness, genome-wide expression profiles  
156 from HGT, HGT-NV and HGT-Cured cell lines were quantified using Illumina BeadChip microarrays

157 (Tables S2 and S3). We first compared the gene expression profiles of HGT-NV cells relative to their  
158 HGT controls. As seen in Figure 3A, more than 2000 genes (HGT-NV-vs-HGT: 2074, HGT-Cured-  
159 vs-HGT: 858) were identified for which mRNA expression was significantly modified at a FDR lower  
160 than 0.01. Of these, a minority of 151 genes had expression changes in either direction greater than 2-  
161 fold suggesting that HuNoV replication has a marginal effect on the whole transcriptional landscape  
162 of replicon harbouring cells. Using the same criteria, comparison of gene expression profiles between  
163 HGT cells and HGT-Cured cells led to identification of 101 genes for which expression was  
164 differentially regulated between the two cell lines (Tables S4-S5). To confirm these observations and  
165 to probe for the accuracy of gene expression measured by microarray analysis, we first compared  
166 expression changes obtained by microarrays with that measured by RT-qPCR analysis. To this end,  
167 ten genes differentially regulated across conditions and spanning a wide range of fold changes were  
168 chosen for RT-qPCR validation (Fig. 3B). Globally, we observed a high correlation between the two  
169 techniques with Pearson's correlation coefficients ranging from 0.90 to 0.95. Direct comparison of  
170 raw microarray signal intensities with differences in cycle threshold obtained by real-time PCR  
171 displayed the same trends suggesting that similar fold changes were primarily the consequence of  
172 gene expression differences and were not an artefact resulting from different gene normalization  
173 techniques. Differential gene expression at the protein level of selected genes was further confirmed  
174 by western blot analysis (Fig. S1A-B). Taken together these data extensively confirms the reliability  
175 of gene expression measurements by microarray analysis.

176 The number of genes showing similar regulation between HGT-NV and HGT-Cured is surprisingly  
177 high and likely reflects cellular long-term adaption to replicating RNA (GO term enrichment analysis  
178 did not reveal specific pathway enrichment in this gene set). Remarkably, we observed an opposite  
179 regulation of several interferon-stimulated genes (ISGs) when comparing the HGT-NV transcriptional  
180 landscape with that of parental HGT cells (Fig. 3C and Table S4). While genes coding for IFITM2,  
181 IFITM3, IFIH1 and IFI27L2 were down-regulated, IFIT1 and IFIT2 genes were significantly up-  
182 regulated in HGT-NV cells. Expression of IFIT1 and IFIT2 proteins is known to be IRF3-dependent  
183 (36, 37), while expression of IFITMs and IFIH1 genes was shown to be mediated by ISRE binding



184 (38, 39), this suggests that while HuNoV replication induces IRF3-dependent immune responses,  
185 activation of ISRE-dependent genes located downstream in the interferon signalling pathway is  
186 inhibited. In line with this observation, microarray analysis identified a statistically significant down-  
187 regulation of the type III interferon receptor (IFNLR1) expression in HGT-NV and HGT-Cured cells  
188 when both were compared to HGT cells. To confirm and extend this observation, we compared  
189 IFNLR1 and IL10RB gene expression by quantitative RT-PCR. Remarkably, we found more than 20-  
190 fold decrease in IFNLR1 expression when parental HGT cells were compared to HGT-NV or HGT-  
191 Cured cells. In contrast, no significant difference was observed when IL10RB gene expression was  
192 measured (Fig. 3D-E).

193 **Sensing of cytosolic RNA and DNA PAMPs by the innate immune system is functional.**

194 To examine whether HGT-NV and HGT-Cured cells were able to detect and mount an innate immune  
195 response against cytosolic PAMPs, poly (I:C) and poly (dA:dT) were transfected in the various HGT-  
196 derived cell lines and viperin expression levels were measured by RT-qPCR (Fig. 4A-B). Although  
197 the cell lines exhibited upregulation of viperin mRNA to various extents, a significant increase of  
198 viperin expression above basal levels was detected in all the three cell lines in response to both  
199 poly(I:C) and poly(dA:dT). Given that the overall levels of viperin following treatment was  
200 comparable across the three cell lines, evident by the relative ratio with respect to  $\beta$ -actin, we  
201 concluded that PAMP sensing and downstream signalling pathways are functional in these cell lines.

202 **The ability to respond to type III but not type I IFN in HGT-NV and HGT-Cured cells is**  
203 **debilitated.**

204 We next investigated the ability of type I and type III interferons to elicit ISGs induction. To this end,  
205 cells were incubated with human IFN- $\beta$  or IFN- $\lambda$ 2 for 16 hours and viperin expression levels were  
206 measured by RT-qPCR. We observed that viperin mRNA was readily induced in all three cell lines in  
207 response to exogenous type I IFN (IFN- $\beta$ ) treatment (Fig. 5A). However, whereas HGT cells  
208 responded to exogenous type III IFN (IFN- $\lambda$ 2) treatment, HGT-NV and HGT-Cured cells did not  
209 (Fig. 5B). To test whether the absence of ISG expression is linked to a defect of STAT1

210 phosphorylation in response to type I or type III interferons, cells were incubated with either  
211 recombinant IFN- $\beta$  or IFN- $\lambda$ 2 and STAT1 phosphorylation status was analysed by western blot using  
212 anti-STAT1 phospho-specific antibodies. We observed that although STAT1 was phosphorylated in  
213 all cell lines following IFN- $\beta$  treatment (Fig. 5C), no STAT1 phosphorylation was detected in HGT-  
214 NV and HGT-Cured cells following IFN- $\lambda$ 2 treatment (Fig. 5D). To ensure that the absence of  
215 STAT1 phosphorylation in HGT-NV cells is not due to a potential clonal effect, different clones as  
216 well as a population of the HGT-NV cells were included in the experiment. Similarly, the clones  
217 represented here by clone 2 (C2) and the polyclonal cell population responded to IFN- $\beta$  but not to  
218 IFN- $\lambda$ 2 (Fig. 5E-F). Taken together, these results indicate that signal transduction induced by type I  
219 IFN is intact while STAT1 phosphorylation induced in response to lambda interferon is inhibited in  
220 HGT cells that sustained HuNoV replication.

#### 221 **IFNLR1 overexpression rescues STAT1 phosphorylation in response to IFN lambda.**

222 To directly test whether the down-regulation of IFNLR1 expression measured in HGT-NV and Cured  
223 cells is responsible for their unresponsiveness to lambda interferon, cells were transfected with an  
224 IFNLR1-expressing plasmid and stimulated with IFN- $\lambda$ 2 the day after. We observed that IFNLR1  
225 expression rescued STAT1 phosphorylation in response to interferon lambda suggesting that IFNLR1  
226 down-regulation in HGT-NV and HGT-Cured cells is responsible for IFN- $\lambda$  insensitivity (Fig. 6). In  
227 addition, this experiment shows that the JAK-STAT signalling cascade comprising JAK1, Tyk2 and  
228 possibly JAK2 (40) is functional and leads to the phosphorylation of STAT1.

#### 229 **Inactivation of interferon type I and III receptors increases HuNoV replication in epithelial** 230 **cells.**

231 To directly test the influence of type I and type III IFNs on HuNoV replication, HGT cells lines  
232 deficient either for the interferon alpha/beta receptor IFNAR1 or for the interferon lambda receptor  
233 IFNLR1 were generated using CRISPR/Cas9-mediated genome editing. To this end, parental HGT  
234 cells were transduced with lentiviruses expressing IFNAR1 or IFNLR1 single guide RNAs and  
235 clonally selected in the presence of puromycin. Individual clones were screened for gene inactivation

236 by IFN- $\beta$  or IFN- $\lambda$ 2 challenging followed by analysis of STAT1 phosphorylation by western-blot and  
237 viperin induction by RT-qPCR (Fig. S2A-B). VPg-linked viral RNA was then transfected and cells  
238 were selected in the presence of 0.5mg/mL G418 for up to 6 days. Relative to day 0 taken as  
239 reference, we observed a significant increase in genomic viral RNA in all cell lines with the exception  
240 of parental HGT cells corroborating the antiviral activity of both type I and type III IFNs on HuNoV  
241 replication (Fig. 7). Similarly, an increased ability of modified cell lines to promote colony formation  
242 induced by the HuNoV replicon was observed (data not shown).

### 243 **IFNLR1 promoter is methylated in HGT-NV and HGT-Cured cells.**

244 The dimeric interferon lambda receptor consists of the ubiquitously expressed IL10RB chain subunit  
245 and the interferon lambda specific chain IFNLR1 whose expression is limited to cells of epithelial  
246 origin (20). Cell-type specific expression of the IFNLR1 subunit was later shown to be inversely  
247 correlated with the methylation of its promoter (41). To examine whether viral replication induced, or  
248 lead to the selection of, alterations of IFNLR1 gene expression through epigenetic modifications, cells  
249 were incubated in the presence 5-aza-2'-deoxycytidine (5azadC), a deoxynucleoside analogue that  
250 strongly inhibits DNA methyltransferase (DNMT) activity. As shown in Fig. 8A, we observed a  
251 significant 6-fold increase of IFNLR1 mRNA levels in HGT-NV cells when compared to cells  
252 incubated with the vehicle only. A statistically significant increase in IFNLR1 gene expression was  
253 also observed in the case of HGT-Cured cells but to a lower extent (2.8-fold). In contrast, no change  
254 in IL10RB expression was detected when the same cells were incubated with 5azadC (Fig. 8B). In  
255 addition, incubation in the presence of MS-275 alone (an HDAC inhibitor) or in combination with  
256 5azadC did not result in increased IFNLR1 expression when compared to 5azadC alone suggesting  
257 that the presence of replicating HuNoV did not modify the chromatin structure of the IFNLR1 gene  
258 (data not shown). Taken together, these results suggest that the replication of HuNoV in HGT  
259 epithelial cells induces a long-term transcriptional silencing of the IFNLR1 gene through the  
260 methylation of its promoter.

### 261 **Discussion**

262 The purpose of this study was to compare genome-wide transcriptional responses of epithelial cells  
263 supporting autonomous HuNoV replication with those elicited by IFN-cured derivatives showing  
264 increased viral replication abilities. We found that the interferon lambda receptor is downregulated in  
265 cells that sustained HuNoV replication. Mechanistically, this down-regulation of IFNLR1 was  
266 mediated by gene methylation as treatment with 5azadC, a DNA methyltransferase inhibitor, rescued  
267 the phenotype. This suggests that the lambda IFN pathway is a key constituent of the innate intrinsic  
268 defence against human norovirus and shows that an endogenous IFN lambda signalling activity is able  
269 to modulate the replication of the virus.

270

271 Influence of lambda interferons on murine noroviruses has been highlighted in previous studies using  
272 different experimental setups (29, 42, 43). In the case of the human norovirus, recent work using the  
273 same replicon in Huh-7 human hepatoma cell line showed that all three types of IFN, when  
274 exogenously added, were able to inhibit HuNoV replication leading to virus clearance during long-  
275 term treatment (44). However, it is not known whether physiological activation of the interferon  
276 pathways, particularly, the lambda IFN signalling pathway exerts an antiviral effect against human  
277 noroviruses. The present results add further evidence for the involvement of type III IFN in the  
278 control of human noroviruses, but extend earlier findings, by showing that physiological levels of type  
279 III IFN signalling can effectively restrict HuNoV replication. One of the major concerns with replicon  
280 systems is that gene expression landscapes might reflect clonal selection of RNA-replicating cells  
281 rather than a universal impact of viral replication on cellular gene expression. To exclude that  
282 differences in gene expression were exclusive to a specific cell type or population, we compared our  
283 dataset with previous genome wide-transcription profiles from Huh-7 hepatoma cells supporting  
284 autonomous replication of HuNoV RNAs (45). We found a (significant) positive correlation between  
285 the two datasets when statistically differentially expressed genes were compared ( $r=0.19$ ;  $p=0.03$ ;  
286  $n=113$ ) (or  $r=0.49$ ;  $p=0.1$ ;  $n=12$ ,  $FC>2$ ), suggesting that analogous cellular responses were induced in  
287 response to HuNoV replication in both cell lines.

288 It is interesting to note that IFNLR1 is also down-regulated in HGT-NV cells which have not been  
289 treated with exogenous type I IFN. This indicates that in the absence of selective pressure mediated by

290 type I IFN, modulation of the type III IFN pathway is preferentially selected over other genes with  
291 antiviral properties as exemplified in other studies using RNA replicons with selectable marker. For  
292 example, in the case of HCV replicon systems, several antiviral genes including *Viperin* and *MXI*  
293 were shown to be silenced through gene methylation, rendering Huh-7 cells permissive to HCV  
294 replication (46, 47).

295 An important observation in this study is the upregulation of several IRF3-dependent genes when  
296 HGT-NV cells were compared to parental HGT cells. As IRF3 activation is essential for type I and III  
297 interferon induction, upregulation of IRF3-dependent genes suggests that HuNoV replication  
298 produces PAMPs that are sensed by RIG-I like receptor(s) which in turn activate the cell-intrinsic  
299 immune signalling pathways. Similarly, down-regulation of ISRE-dependent genes in HGT-NV when  
300 compared to HGT-Cured cells, which have silenced the IFNLR1 gene to the same extent, put forward  
301 the idea that HuNoV replication induces IFN-dependent responses. In line with this, a recent study  
302 using the same replicon identified RIG-I and MDA5 proteins as potent negative regulator of HuNoV  
303 replication suggesting that viral RNA secondary structures can readily be detected during replication  
304 (Dang et al., 2018). These observations are however in striking contrast to the study of Qu and  
305 colleagues in which transfection of stool-derived HuNoV RNA readily replicated in 293T cells but  
306 failed to induce detectable interferon responses (48). Differences in experimental setups such as  
307 including cell lines, virus strains, stable versus transient viral replication and IFN response readouts  
308 may account for this discordant observation. Investigating whether diverse strains of HuNoV induce  
309 interferon responses in cell-derived human intestinal enteroids will be of interest to probe the  
310 influence of HuNoV replication on IFN induction and responses.

311

312 Increased replication of HuNoV in HGT-cured compared to either IFNAR and IFNLR1 knock-out  
313 cells suggests that differentially regulated genes other than IFN receptors may favour virus  
314 replication. However, manual curation of genes differentially regulated between parental and IFN-  
315 cured cells did not reveal individual genes convincingly known to modulate viral replication other  
316 than IFNLR1 and genes involved in the biosynthesis and trafficking of cholesterol. This suggests

317 either that a low but collective influence of these genes contributes to the increased replication of  
318 HuNoV observed in HGT-Cured cells, or that some of the differentially expressed genes identified  
319 have a potent yet unknown proviral activity towards the human norovirus.

320

321 Overall, our results provide insights into the interactions between the human norovirus and innate  
322 cellular responses and show that endogenous levels of  $\lambda$ -IFNs control HuNoV replication suggesting  
323 that they may have a therapeutic potential in the treatment of noroviral infections. In addition, the  
324 high confidence gene expression datasets provided with this study is expected be useful for the  
325 selection and examination of new targets aimed to antiviral therapy.

326

## 327 **Methods**

328

### 329 **Cells and Media**

330 Human gastric tumour (HGT) cells, human norovirus replicon-harboursing HGT (HGT-NV) cells and  
331 IFN- $\alpha$  interferon-treated HGT-NV cells (HGT-Cured) were maintained in Dulbecco's minimal  
332 essential medium supplemented with 10% fetal calf serum, 2 mM glutamine, 100 U/ml penicillin, 100  
333  $\mu$ g/ml streptomycin, 1X non-essential amino acid and 0.5 mg/ml G418 in the case of HGT-NV cells.  
334 The DNA methyltransferase inhibitor 5-Aza-2'-deoxycytidine (Sigma-Aldrich, A3656) was diluted in  
335 sterile water and used at a final concentration of 10  $\mu$ M.

### 336 **Microarray analysis**

337 Four lineages of HGT, HGT-NV and HGT-Cured cells were grown in tissue culture flasks in the  
338 appropriate culture media. After four successive passages, total RNA was extracted using TRIzol®  
339 (Invitrogen). Microarray analysis was done using the HumanHT-12 v4 Expression BeadChip  
340 (Illumina, Chesterford, UK). All microarray experiments, data normalizations and preliminary  
341 analysis were fulfilled by the Cambridge Genomic Services, UK.

## 342 **Quantitative RT-PCR analysis**

343 Total cell RNA was extracted using a GenElute Mammalian Total RNA Miniprep kit (Sigma) and  
344 contaminating genomic DNA was removed through RNase-free DNase I treatment (Roche). Total  
345 RNA was then reverse transcribed using random hexamers and the M-MLV RT enzyme (Promega).  
346 SYBR green-based quantitative PCR was performed using gene-specific primers listed in  
347 (Supporting information Table 6). Each experimental condition was measured in biological triplicate  
348 and results are shown as a ratio to levels detected in control cells according to the  $\Delta\Delta C_t$  method (49).  
349 Additional non-template and non-reverse transcriptase samples were analysed as negative controls.  
350 Data were collected using a ViiA 7 Real-Time PCR System (Applied Biosystems). Genomic viral  
351 RNA was quantified by one step RT-qPCR using GI NV-specific primers. Viral genome copy  
352 numbers were calculated by interpolation from a standard curve generated using serial dilutions of  
353 viral RNA transcribed from the pNV101 plasmid coding for the full-length Norwalk genome (50).

354

## 355 **Nucleic acid transfection and IFN treatment**

356 Transfections of plasmid DNA or purified viral RNA (NV replicon) were carried out using  
357 Lipofectamine 2000 (Invitrogen) according to manufacturer's instructions. Briefly, cells were seeded  
358 in antibiotic-free growth medium at a density of  $2 \times 10^5$  or  $1 \times 10^6$  cells per well in 24- or 6-well plates,  
359 respectively, and incubated overnight at 37°C. Lipofectamine 2000 reagent was diluted in Opti-  
360 MEM® (Gibco) and incubated for 5 minutes at 25°C. After the incubation, plasmid DNA or viral  
361 RNA, diluted in Opti-MEM® (Gibco), was mixed with the Lipofectamine: Opti-MEM mixture,  
362 vortexed briefly and incubated at 25°C for 20 minutes. The DNA or RNA complex was subsequently  
363 inoculated onto 80-90 % confluent cell monolayers, followed by incubation at 37°C. For viral RNA  
364 transfection, media was replaced after 24 h with fresh complete growth medium containing G418 at a  
365 concentration of 0.5 mg/ml. For IFN treatments, cells were seeded as described above and incubated  
366 at 37°C for indicated time-points with or without recombinant type I IFN (IFN- $\beta$ ; Peprotech, Cat

367 N°:300-02BC), or type III IFN (IFN- $\lambda$ 2; Peprotech, Cat N°:300-02K) at a final concentration of 0.1  
368  $\mu$ g/ml.

### 369 **Immunofluorescence microscopy**

370 Cells were plated on 12 mm glass coverslips and allowed to adhere overnight before fixation with 4%  
371 paraformaldehyde in PBS. Cells were then permeabilized for 5 min with PBS-Triton X-100 0.2% and  
372 unspecific antigens were blocked for 1h using 2% normal goat serum (Sigma-S2007) in PBS-Tween-  
373 20 0.1% (PBST). Cells were then incubated for 1h with primary mouse monoclonal J2 anti-dsRNA  
374 antibodies in PBST at a dilution of 1:1000 (J2, SCICONS English & Scientific Consulting, Hungary).  
375 After extensive washes with PBST, species-matched AlexaFluor-conjugated secondary antibodies  
376 (ThermoFisher Scientific, A-11029) were added at a dilution of 1:500 in PBST for one additional  
377 hour. Coverslips were extensively washed and mounted on slides with Mowiol supplemented with  
378 DAPI and DABCO. Confocal micrographs were acquired on a Leica TCS SP5 confocal fitted with a  
379 63x 1.3NA oil immersion objective using 405nm and 488nm laser excitation lines under sequential  
380 channel scanning to prevent fluorophore bleed-through artefacts due to spectral overlap.

### 381 **Western blot analysis**

382 Cell lysates were prepared in radio-immuno precipitation assay buffer (RIPA: 150 mM NaCl, 0.5%  
383 sodium deoxycholate, 0.1% SDS, 1mM EDTA, 1% Triton X-100, and 50 mM Tris pH8)  
384 supplemented with protease and phosphatase inhibitors (Calbiochem; Cat N°: 539134 and 524625).  
385 Protein concentrations were determined by BCA assay (Thermo Fisher Scientific). Equal amounts of  
386 total proteins were resolved by SDS-PAGE and transferred to nitrocellulose membranes. Blocking of  
387 unspecific antigens was carried out in 5% non-fat dried milk or 5% BSA in PBST for 1 h at 4°C.  
388 Primary antibodies were diluted in blocking buffer and incubated overnight at 4°C with gentle rocking  
389 (Supporting information Table 7). Membranes were washed three times in PBST for 5 min at RT.  
390 Species-matched IRDye-800CW secondary antibodies were diluted in blocking buffer as before and  
391 incubated at RT for 1 h. Membranes were washed again three times in PBST for 5 min at RT.  
392 Fluorescent signal was detected through an Odyssey CLx infrared imaging system (Li-COR).



### 393 **Generation of IFNAR1 or IFNLR1 knockout HGT cells**

394 HGT cells knockout for IFNAR1 or IFNLR1 genes were generated using the CRISPR/Cas9 system.  
395 Lentivirus vectors encoding single-guide RNAs against IFNAR1 or IFNLR1 were generously  
396 provided by Dr Steeve Boulant and are described in Pervolaraki et al. (51). Vesicular stomatitis virus  
397 G-protein-pseudotyped lentiviral particles were generated by transient transfection of 293T cells  
398 grown in 6-well plates using 1.25 µg lentiviral vector, 0.63 µg pMDLg/pRRE (Addgene #12251),  
399 0.31 µg pRSV-Rev (Addgene #12253) and 0.38 µg pMD2.G (Addgene #12259) per well. Parental  
400 HGT cells were transduced with lentiviral supernatants and incubated for 48 h. Transduced cells were  
401 then selected on the basis of their resistance to puromycin at a concentration of 2.5 µg/mL. Clonal  
402 isolation was performed by limiting dilution into 96-well plate at a density of 0.3 cell per well and  
403 single cell clones were selected on the basis of visual examination. Single cell clones were expanded  
404 and tested for IFNAR1 or IFNLR1 gene disruption by RT-qPCR measurement of viperin induction  
405 following incubation with IFN-β or IFN-λ2, respectively. Absence of STAT1 phosphorylation  
406 following incubation with receptor-matched interferons confirmed the gene ablation.

### 407 **Statistical analysis and data sharing**

408 Statistical significance was determined from experiments where  $n \geq 3$  using two-tailed Student *t* tests  
409 in Prism 6.0 (GraphPad). All microarray expression data reported in this study have been deposited  
410 into Gene Expression Omnibus (GEO, <http://www.ncbi.nlm.nih.gov/geo>) with the accession number  
411 GSE111041.

412

### 413 **Figure legends**

414 **Figure 1.** Generation and characterization of stable HuNoV replicons in HGT and U2OS cell lines.

415 A. Diagram showing the steps used to generate the various cell lines carrying human norovirus  
416 replicons and their IFN-cured counterparts.

417 B. Total cellular RNA was extracted from each cell line and viral RNA quantified by RT-qPCR. Viral  
418 RNA copy numbers were normalized to the total input RNA and expressed as genome equivalents/ $\mu$ g  
419 of input RNA. The error bars represent the standard deviation determined from four biological  
420 replicates. Viral RNA copy numbers were below the limit of detection in both HGT and HGT-Cured  
421 cells. The dotted line represents the low limit of detection.

422 C. Detection of viral replication complexes by confocal imaging. Representative merged confocal  
423 micrographs showing the detection of dsRNA (green) in indicated cell lines. Nuclei were stained with  
424 DAPI (blue). Scale bars correspond to 20 $\mu$ m.

425 **Figure 2.** HGT-Cured cells demonstrate enhanced HuNoV replication.

426 A. HGT and HGT-Cured cells were transfected with VPg-linked replicon RNA. After five days of  
427 selection with G418 at a concentration of 0.5 mg/mL, cellular morphology was analysed by light  
428 microscopy.

429 B. Cells transfected with VPg-linked RNA were harvested at various time points post-transfection for  
430 total RNA extraction and viral RNA was quantified by RT-qPCR. Viral RNA levels were determined  
431 by comparison to a standard curve and normalized to the RNA input. The data are presented as mean  
432 and standard deviation from three replicates. Indicated values are expressed as fold change in genome  
433 equivalent normalized to viral RNA levels at 6 hours post-transfection to control for transfection  
434 efficiency. Unpaired two-tailed Student's t-test was used to evaluate the statistical significance.

435

436 **Figure 3.** Microarray analysis and validation of differentially regulated genes between HGT-NV,  
437 HGT-Cured and parental HGT cells.

438 A. Volcano plots of differentially expressed genes from microarray analysis comparing gene  
439 expression in HGT-NV or HGT-Cured compared to parental HGT cells. Significantly up- or down-  
440 regulated genes (FDR<0.01 and  $|\log_2$  fold change|  $\geq$  1) are represented in red or green, respectively.

441 B. Fold change correlation between microarray analysis and quantitative real-time PCR (RT-qPCR).  
442 Scatter plots comparing  $\log_2$  fold changes of selected genes measured by microarray analysis and RT-  
443 qPCR in HGT-NV or HGT-Cured compared to parental HGT cells. Error bars represent the standard  
444 deviation of biological quadruplicate experiments analyzed in triplicate reactions. The Pearson  
445 correlation coefficient ( $r$ ) and the number of pairs analysed ( $n$ ) are indicated on each graph. Dotted  
446 lines illustrate the 95% confidence interval of the linear regression.

447 C. Venn diagrams representing the overlap of significantly up- and down-regulated genes between  
448 HGT-NV or HGT-Cured cells compared to parental HGT cells. The top ten genes within each  
449 category are shown.

450 D-E. IFNLR1 (D) but not IL10RB (E) gene expression is down-regulated in HGT-NV and HGT-  
451 Cured cells. Changes in gene expression of IFNLR1 and IL10RB mRNA levels were normalized to  $\beta$ -  
452 actin levels and calculated using the  $\Delta\Delta C_T$  method. Relative expression was determined from one  
453 experiment performed in biological triplicate and compared to the expression levels measured in HGT  
454 control. Statistical significance was determined using the unpaired  $t$  test. Error bars represent the  
455 standard deviation between biological replicates.

456

457 **Figure 4.** Innate immune responses to RNA and DNA PAMPs are functional.

458 Cells were transfected with poly (I:C) (A) or poly (dA:dT) (B) and total RNA was harvested 8h post-  
459 transfection for quantification of viperin mRNA levels by RT-qPCR. Viperin mRNA levels were  
460 expressed as differences of cycle threshold ( $C_t$ ) of viperin, relative to the  $C_t$  of beta-actin. The error  
461 bars represent standard deviation, determined from the result of three replicates.

462

463 **Figure 5.** The ability to respond to type III but not type I IFN is debilitated in HGT-NV and HGT-  
464 Cured cells.

465 Cells were treated with type I (IFN- $\beta$ ) (A) or type III interferon (IFN- $\lambda$ 2) (B), incubated overnight and  
466 harvested for total RNA extraction and quantification of viperin mRNA levels by RT-qPCR. Viperin  
467 mRNA expression levels were expressed as differences of cycle threshold ( $C_t$ ) of viperin, relative to  
468 the  $C_t$  of beta-actin. The error bars represent the standard deviation, determined from the result of  
469 three replicates.

470 (C-F) Western-blot analysis showing STAT1 phosphorylation after stimulation with type I and type  
471 III interferons in HGT, HGT-NV and HGT-Cured cell lines (C, E). HGT-NV Clone 2 (C2) and  
472 population of cells (pop) were included in the experiment (D, F). GAPDH was used as loading  
473 control.

474

475 **Figure 6.** Overexpression of IFNLR1 in HGT-NV and HGT-Cured cells rescues the ability to respond  
476 to type III IFN and the loss of the receptor enhances viral RNA replication in HGT cells.

477 HGT, HGT-NV and HGT-Cured were transfected with IFNLR1 expressing plasmid and STAT1  
478 phosphorylation was measured in whole cell lysate by western blot after incubating cells with type III  
479 IFN for 15 min (A). STAT1 was used as a positive control and GAPDH was used as the loading  
480 control. HGT IFNLR1<sup>-/-</sup> cells transfected with GI viral VPg-linked RNA were harvested at 0 and 5  
481 days post-transfection for total RNA extraction and viral RNA was quantified by RT-qPCR (B). The  
482 viral RNA levels were determined by comparing to a standard curve and normalized to the total input  
483 RNA. The data are presented as the mean and standard deviation from at least 11 replicates and are  
484 expressed as fold change in genome equivalent at day 0.

485

486 **Figure 7.** Genetic ablation of IFNAR1 and IFNLR1 interferon receptors promotes HuNoV  
487 replication.

488 Parental HGT, IFNAR1 and IFNLR1 knock-out cells were transfected with VPg-linked replicon RNA  
489 and submitted to G418 selection. Total cellular RNA was harvested at various time points post-

490 transfection and viral RNA was quantified by RT-qPCR. Relative viral replication was determined  
491 from one experiment performed in biological triplicate and compared to the replication levels  
492 measured in HGT control at day 0. Statistical significance was determined using the unpaired *t* test.  
493 Error bars represent the standard deviation between biological replicates.

494

495 **Figure 8. IFNLR1 promoter is methylated during long-term HuNoV replication.**

496 HGT, HGT-NV and HGT-Cured cells were incubated in the presence of 10  $\mu$ M 5azadC for 72 hours  
497 or left untreated. Total cell RNA was extracted and IFNLR1 and IL10RB expression was measured by  
498 RT-qPCR. Total cellular RNA was harvested 72 hours post-treatment and IFNLR1 and IL10RB  
499 mRNA were quantified by RT-qPCR. Relative gene expression was determined from one experiment  
500 performed in biological triplicate and compared to the expression levels measured in corresponding  
501 untreated cells. Statistical significance was determined using the unpaired *t* test. Error bars represent  
502 the standard deviation between biological replicates.

503

504 **Supplementary figure legends**

505 **Figure S1.** Expression change validation of selected genes at the transcription and translation  
506 levels.

507 A. Direct comparison between microarray signal intensities and difference in cycle thresholds for  
508 *ANXA1* and *IFITM3* genes.

509 B. Validation by western-blot analysis of *ANXA1* and *IFITM3* protein levels in HGT, HGT-NV and  
510 HGT-Cured cell lines. The indicated ratios represent the *ANXA1* or *IFITM3* protein levels  
511 normalized to the corresponding GAPDH loading controls relative to parental HGT cells.

512

513 **Figure S2.** Western blot validation of CRISPR/Cas9-induced knockout cells.

514 A-B. HGT wild-type cells as well as IFNAR1 (A) and IFNLR1 (B) CRISPR/Cas9 clones were treated  
515 with type I (IFN- $\beta$ ) (A) or type III interferon (IFN- $\lambda$ 2) (B) for 15 min and STAT1 phosphorylation  
516 (pT701) was measured by immunoblot analysis. GAPDH was used as a loading control.

517

### 518 **Funding information**

519 I.G. is a Wellcome Senior Fellow and this work was supported by funding from the Wellcome Trust  
520 (Ref: 207498/Z/17/Z). F.S. was funded by a Biotechnology and Biological Sciences Research Council  
521 (BBSRC) sLoLa grant (BB/K002465/1). S.A.E. is supported through a Cambridge Trust Cambridge-  
522 Africa PhD studentship. The funders had no role in study design, data collection and interpretation, or  
523 the decision to submit the work for publication

524

### 525 **Author contributions**

526

527 S.A.E., F.S., M.H., and I.G. designed, performed the research and analysed the data. S.A.E., F.S., and  
528 I.G. wrote the manuscript.

529

### 530 **Acknowledgements**

531 We thank Laure Dumoutier (de Duve Institute, Universite Catholique de Louvain) for the gift of the  
532 IFNLR1 (LICR2) expressing plasmid. We thank K Green (NIH, Bethesda) and KO Chang for the  
533 provision of pNV-Neo.

534

### 535 **Conflicts of interest**

536 The authors declare that they have no conflict of interest.

537

### 538 **References**

539 1. **Fankhauser RL, Noel JS, Monroe SS, Ando T, Glass RI.** 1998. Molecular Epidemiology of  
540 “Norwalk-like Viruses” in Outbreaks of Gastroenteritis in the United States. *J Infect Dis*  
541 **178**:1571–1578.

- 542 2. **Mawatari M, Kato Y.** 2014. Norovirus Gastroenteritis. *Emerg Infect Dis Clin Case Stud*  
543 **361**:203–212.
- 544 3. **Hall AJ, Lopman BA, Payne DC, Patel MM, Gastañaduy PA, Vinjé J, Parashar UD.**  
545 2013. Norovirus disease in the united states. *Emerg Infect Dis* **19**:1198–1205.
- 546 4. **Lopman B, Ahmed SM, Robinson A, Verhoef L, Koopmans M, Hall AJ.** 2013. The global  
547 prevalence of norovirus among cases of gastroenteritis. *Bangkok, Thail Vaccines Enteritis Dis.*
- 548 5. **Ludwig A, Adams O, Laws HJ, Schroten H, Tenenbaum T.** 2008. Quantitative detection of  
549 norovirus excretion in pediatric patients with cancer and prolonged gastroenteritis and  
550 shedding of norovirus. *J Med Virol* **80**:1461–1467.
- 551 6. **Patel MM, Widdowson MA, Glass RI, Akazawa K, Vinjé J, Parashar UD.** 2008.  
552 Systematic literature review of role of noroviruses in sporadic gastroenteritis. *Emerg Infect Dis*  
553 **14**:1224–1231.
- 554 7. **Phillips G, Tam CC, Conti S, Rodrigues LC, Brown D, Iturriza-Gomara M, Gray J,**  
555 **Lopman B.** 2010. Community incidence of norovirus-associated infectious intestinal disease  
556 in England: Improved estimates using viral load for norovirus diagnosis. *Am J Epidemiol*  
557 **171**:1014–1022.
- 558 8. **Payne DC, Vinjé J, Szilagyi PG, Edwards KM, Staat MA, Weinberg GA, Hall CB,**  
559 **Chappell J, Bernstein DI, Curns AT, Wikswo M, Shirley SH, Hall AJ, Lopman B,**  
560 **Parashar UD.** 2013. Norovirus and Medically Attended Gastroenteritis in U.S. Children. *N*  
561 *Engl J Med* **368**:1121–1130.
- 562 9. **Belliot G, Lopman BA, Ambert-Balay K, Pothier P.** 2014. The burden of norovirus  
563 gastroenteritis: An important foodborne and healthcare-related infection. *Clin Microbiol Infect*  
564 **20**:724–730.
- 565 10. **Bartsch SM, Lopman BA, Ozawa S, Hall AJ, Lee BY.** 2016. Global economic burden of  
566 norovirus gastroenteritis. *PLoS One* **11**:e0151219.
- 567 11. **Ettayebi K, Crawford SE, Murakami K, Broughman JR, Karandikar U, Tenge VR, Neill**  
568 **FH, Blutt SE, Zeng XL, Qu L, Kou B, Opekun AR, Burrin D, Graham DY, Ramani S,**  
569 **Atmar RL, Estes MK.** 2016. Replication of human noroviruses in stem cell-derived human

- 570 enteroids. *Science* (80- ) **353**:1387–1393.
- 571 12. **Jones M, Watanabe M, Zhu S, Graves C, Keyes L, Grau K, Gonzalez-Hernandez M,**  
572 **Iovine N, Wobus C, Vinjé J, Tibbetts S, Wallet S, Karst S.** 2014. Enteric bacteria promote  
573 human and mouse norovirus infection of B cells. *Science* (80- ) **346**:755–759.
- 574 13. **Wobus CE, Karst SM, Thackray LB, Chang KO, Sosnovtsev S V., Belliot G, Krug A,**  
575 **Mackenzie JM, Green KY, Virgin IV HW.** 2004. Replication of Norovirus in cell culture  
576 reveals a tropism for dendritic cells and macrophages. *PLoS Biol* **2**:e432.
- 577 14. **Chang K-O, Sosnovtsev S V., Belliot G, King AD, Green KY.** 2006. Stable expression of a  
578 Norwalk virus RNA replicon in a human hepatoma cell line. *Virology* **353**:463–473.
- 579 15. **Thorne LG, Goodfellow IG.** 2014. Norovirus gene expression and replication. *J Gen Virol*  
580 **95**:278–291.
- 581 16. **Isaacs A, Lindenmann J.** 1988. Virus Interference: I. The Interferon. *CA Cancer J Clin*  
582 **38**:280–290.
- 583 17. **Kotenko S V., Gallagher G, Baurin V V., Lewis-Antes A, Shen M, Shah NK, Langer JA,**  
584 **Sheikh F, Dickensheets H, Donnelly RP.** 2003. IFN- $\lambda$ s mediate antiviral protection through a  
585 distinct class II cytokine receptor complex. *Nat Immunol*.
- 586 18. **Sheppard P, Kindsvogel W, Xu W, Henderson K, Schlutsmeyer S, Whitmore TE,**  
587 **Kuestner R, Garrigues U, Birks C, Roraback J, Ostrander C, Dong D, Shin J, Presnell S,**  
588 **Fox B, Haldeman B, Cooper E, Taft D, Gilbert T, Grant FJ, Tackett M, Krivan W,**  
589 **McKnight G, Clegg C, Foster D, Klucher KM.** 2003. IL-28, IL-29 and their class II  
590 cytokine receptor IL-28R. *Nat Immunol*.
- 591 19. **De Weerd NA, Samarajiwa SA, Hertzog PJ.** 2007. Type I interferon receptors:  
592 Biochemistry and biological functions. *J Biol Chem*.
- 593 20. **Sommereyns C, Paul S, Staeheli P, Michiels T.** 2008. IFN- $\lambda$  (IFN- $\lambda$ ) is expressed in a  
594 tissue-dependent fashion and primarily acts on epithelial cells in vivo. *PLoS Pathog* **4**.
- 595 21. **Blazek K, Eames HL, Weiss M, Byrne AJ, Perocheau D, Pease JE, Doyle S, McCann F,**  
596 **Williams RO, Udalova IA.** 2015. IFN- $\lambda$  resolves inflammation via suppression of neutrophil  
597 infiltration and IL-1 $\beta$  production. *J Exp Med* **212**:845–853.



- 598 22. **Witte K, Gruetz G, Volk HD, Looman AC, Asadullah K, Sterry W, Sabat R, Wolk K.**  
599 2009. Despite IFN- receptor expression, blood immune cells, but not keratinocytes or  
600 melanocytes, have an impaired response to type III interferons: Implications for therapeutic  
601 applications of these cytokines. *Genes Immun* **10**:702–714.
- 602 23. **Dickensheets H, Sheikh F, Park O, Gao B, Donnelly RP.** 2013. Interferon-lambda (IFN- )  
603 induces signal transduction and gene expression in human hepatocytes, but not in lymphocytes  
604 or monocytes. *J Leukoc Biol* **93**:377–385.
- 605 24. **Ank N, Iversen MB, Bartholdy C, Staeheli P, Hartmann R, Jensen UB, Dagnaes-Hansen**  
606 **F, Thomsen AR, Chen Z, Haugen H, Klucher K, Paludan SR.** 2008. An Important Role for  
607 Type III Interferon (IFN- /IL-28) in TLR-Induced Antiviral Activity. *J Immunol* **180**:2474–  
608 2485.
- 609 25. **Syedbasha M, Egli A.** 2017. Interferon Lambda: Modulating immunity in infectious diseases.  
610 *Front Immunol*.
- 611 26. **Lee S, Baldrige MT.** 2017. Interferon-lambda: A potent regulator of intestinal viral  
612 infections. *Front Immunol*.
- 613 27. **Hemann EA, Gale M, Savan R.** 2017. Interferon lambda genetics and biology in regulation  
614 of viral control. *Front Immunol* **8**.
- 615 28. **Mordstein M, Neugebauer E, Ditt V, Jessen B, Rieger T, Falcone V, Sorgeloos F, Ehl S,**  
616 **Mayer D, Kochs G, Schwemmle M, Gunther S, Drosten C, Michiels T, Staeheli P.** 2010.  
617 Lambda Interferon Renders Epithelial Cells of the Respiratory and Gastrointestinal Tracts  
618 Resistant to Viral Infections. *J Virol* **84**:5670–5677.
- 619 29. **Baldrige MT, Lee S, Brown JJ, McAllister N, Urbanek K, Dermody TS, Nice TJ, Virgin**  
620 **HW.** 2017. Expression of *Ifnlr1* on Intestinal Epithelial Cells Is Critical to the Antiviral  
621 Effects of Interferon Lambda against Norovirus and Reovirus. *J Virol* **91**:e02079-16.
- 622 30. **Nice TJ, Baldrige MT, McCune BT, Norman JM, Lazear HM, Artyomov M, Diamond**  
623 **MS, Virgin HW.** 2015. Interferon- $\lambda$  cures persistent murine norovirus infection in the absence  
624 of adaptive immunity. *Science (80- )* **347**:269–273.
- 625 31. **Baldrige MT, Nice TJ, McCune BT, Yokoyama CC, Kambal A, Wheadon M, Diamond**

- 626 **MS, Ivanova Y, Artyomov M, Virgin HW.** 2014. Commensal microbes and interferon-  
627 lambda determine persistence of enteric murine norovirus infection\_supplemental data.  
628 Science **3**:1–9.
- 629 32. **Rocha-Pereira J, Jacobs S, Noppen S, Verbeken E, Michiels T, Neyts J.** 2018. Interferon  
630 lambda (IFN- $\lambda$ ) efficiently blocks norovirus transmission in a mouse model. Antiviral Res  
631 **149**:7–15.
- 632 33. **Arthur SE, Sorgeloos F, Hosmillo M, Goodfellow I.** 2019. Epigenetic suppression of  
633 interferon lambda receptor expression leads to an enhanced HuNoV replication in vitro.  
634 bioRxiv 523282.
- 635 34. **Weber F, Wagner V, Rasmussen SB, Hartmann R, Paludan SR.** 2006. Double-Stranded  
636 RNA Is Produced by Positive-Strand RNA Viruses and DNA Viruses but Not in Detectable  
637 Amounts by Negative-Strand RNA Viruses. J Virol **80**:5059–5064.
- 638 35. **Son K-N, Liang Z, Lipton HL.** 2015. Double-Stranded RNA Is Detected by  
639 Immunofluorescence Analysis in RNA and DNA Virus Infections, Including Those by  
640 Negative-Stranded RNA Viruses. J Virol **89**:9383–9392.
- 641 36. **Andersen J, VanScoy S, Cheng TF, Gomez D, Reich NC.** 2008. IRF-3-dependent and  
642 augmented target genes during viral infection. Genes Immun **9**:168–175.
- 643 37. **Grandvaux N, Servant MJ, tenOever B, Sen GC, Balachandran S, Barber GN, Lin R,  
644 Hiscott J.** 2002. Transcriptional Profiling of Interferon Regulatory Factor 3 Target Genes:  
645 Direct Involvement in the Regulation of Interferon-Stimulated Genes. J Virol **76**:5532–5539.
- 646 38. **Friedman RL, Manly SP, McMahon M, Kerr IM, Stark GR.** 1984. Transcriptional and  
647 posttranscriptional regulation of interferon-induced gene expression in human cells. Cell  
648 **38**:745–755.
- 649 39. **Reid LE, Brasnett AH, Gilbert CS, Porter AC, Gewert DR, Stark GR, Kerr IM.** 1989. A  
650 single DNA response element can confer inducibility by both alpha- and gamma-interferons.  
651 Proc Natl Acad Sci U S A **86**:840–4.
- 652 40. **Odendall C, Dixit E, Stavru F, Bierne H, Franz KM, Durbin AF, Boulant S, Gehrke L,  
653 Cossart P, Kagan JC.** 2014. Diverse intracellular pathogens activate type III interferon

- 654 expression from peroxisomes. *Nat Immunol* **15**:717–726.
- 655 41. **Ding S, Houry-Hanold W, Iwasaki A, Robek MD.** 2014. Epigenetic Reprogramming of the  
656 Type III Interferon Response Potentiates Antiviral Activity and Suppresses Tumor Growth.  
657 *PLoS Biol* **12**.
- 658 42. **Baldrige MT, Nice TJ, McCune BT, Yokoyama CC, Kambal A, Wheadon M, Diamond**  
659 **MS, Ivanova Y, Artyomov M, Virgin HW.** 2015. Commensal microbes and interferon- $\lambda$   
660 determine persistence of enteric murine norovirus infection. *Science (80- )* **347**:266–269.
- 661 43. **Rocha-Pereira J, Jacobs S, Noppen S, Verbeken E, Michiels T, Neyts J.** 2018. Interferon  
662 lambda (IFN- $\lambda$ ) efficiently blocks norovirus transmission in a mouse model. *Antiviral Res*  
663 **149**:7–15.
- 664 44. **Dang W, Xu L, Yin Y, Chen S, Wang W, Hakim MS, Chang KO, Peppelenbosch MP,**  
665 **Pan Q.** 2018. IRF-1, RIG-I and MDA5 display potent antiviral activities against norovirus  
666 coordinately induced by different types of interferons. *Antiviral Res* **155**:48–59.
- 667 45. **Chang K-O.** 2009. Role of Cholesterol Pathways in Norovirus Replication. *J Virol* **83**:8587–  
668 8595.
- 669 46. **Naka K, Abe K ichi, Takemoto K, Dansako H, Ikeda M, Shimotohno K, Kato N.** 2006.  
670 Epigenetic silencing of interferon-inducible genes is implicated in interferon resistance of  
671 hepatitis C virus replicon-harboring cells. *J Hepatol* **44**:869–878.
- 672 47. **Chen Q, Denard B, Huang H, Ye J.** 2013. Epigenetic Silencing of Antiviral Genes Renders  
673 Clones of Huh-7 Cells Permissive for Hepatitis C Virus Replication. *J Virol* **87**:659–665.
- 674 48. **Qu L, Murakami K, Broughman JR, Lay MK, Guix S, Tenge VR, Atmar RL, Estes MK.**  
675 2016. Replication of Human Norovirus RNA in Mammalian Cells Reveals Lack of Interferon  
676 Response. *J Virol* **90**:8906–8923.
- 677 49. **Schmittgen TD, Livak KJ.** 2008. Analyzing real-time PCR data by the comparative CT  
678 method. *Nat Protoc* **3**:1101–1108.
- 679 50. **Fernandez-vega V, Sosnovtsev S V, King AD, Mitra T, Gorbalenya A, Green KY.** 2004.  
680 Norwalk Virus N-Terminal Nonstructural Protein Is Associated with Disassembly of the Golgi  
681 Complex in Transfected Cells. *J Virol* **78**:4827–4837.

682 51. **Pervolaraki K, Stanifer ML, Münchau S, Renn LA, Albrecht D, Kurzhals S, Senís E,**  
683 **Grimm D, Schröder-Braunstein J, Rabin RL, Boulant S.** 2017. Type I and type III  
684 interferons display different dependency on mitogen-activated protein kinases to mount an  
685 antiviral state in the human gut. *Front Immunol* **8**.  
686  
687

**Fig. 1****A**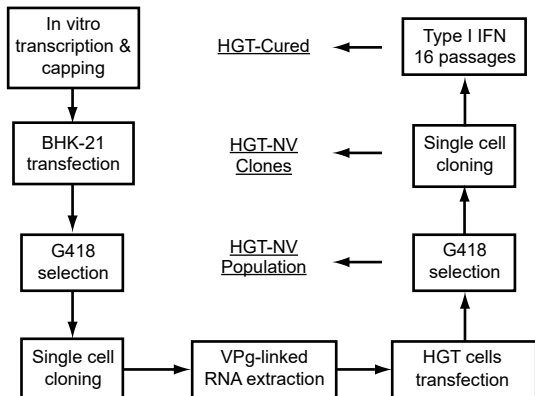**B**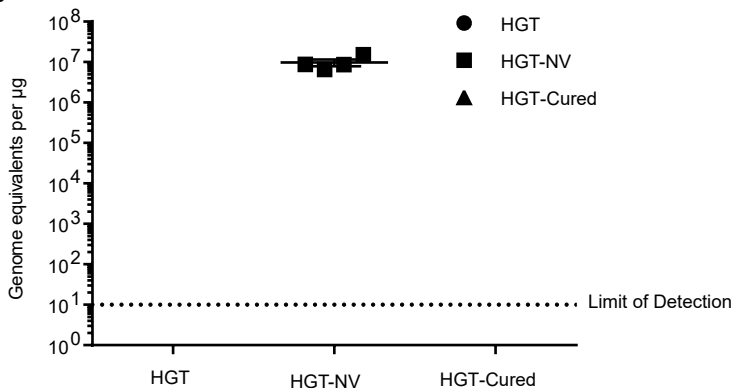**C**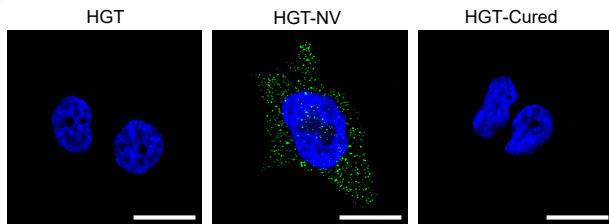

**Fig. 2****A**

Amount of RNA transfected

1.5  $\mu$ g4  $\mu$ g

HGT

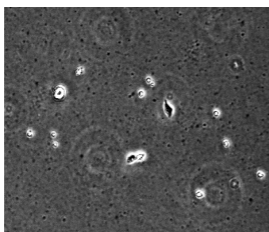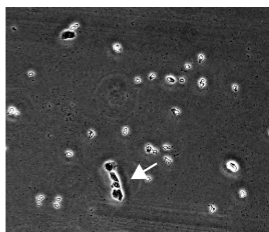HGT  
Cured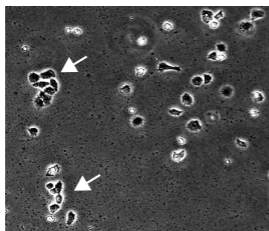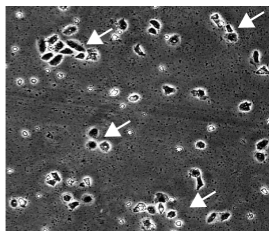**B**Fold change in viral RNA genome  
equivalents relative to day 0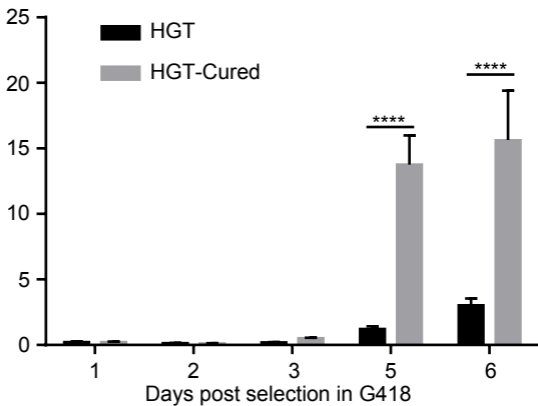

**Fig. 3**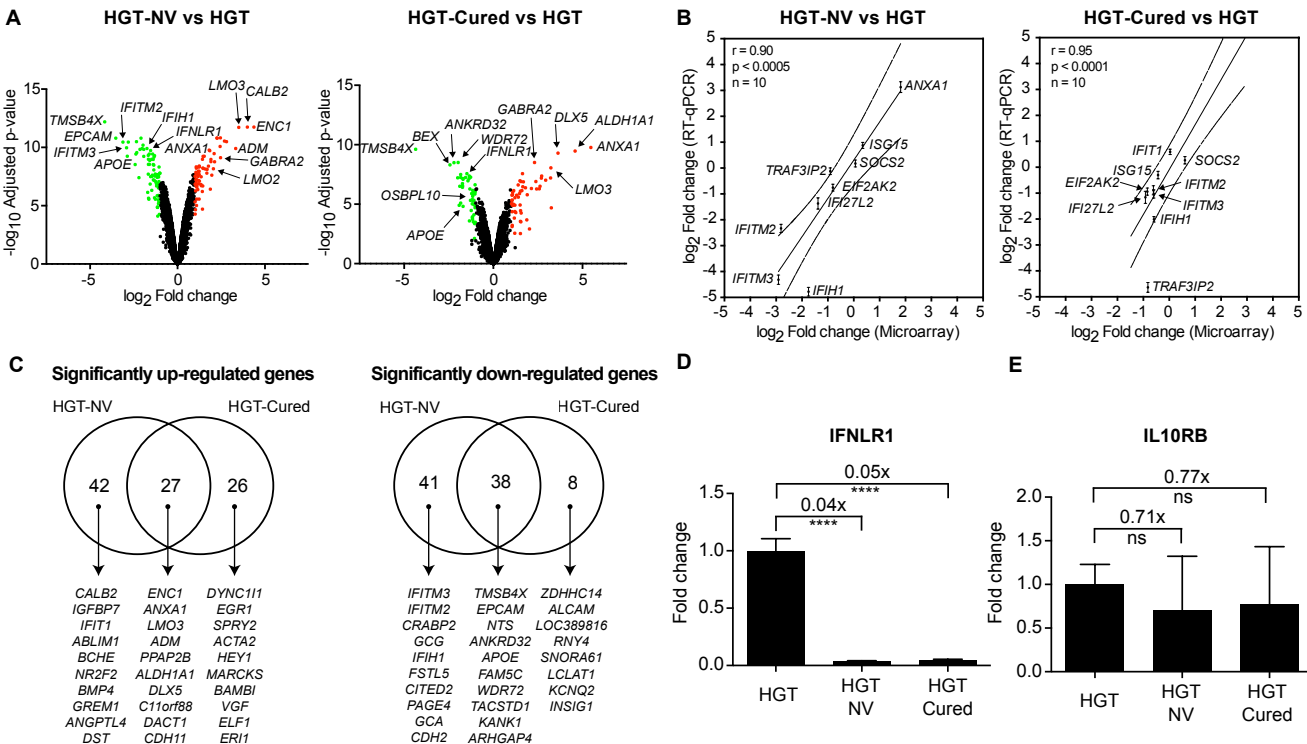

**Fig. 4****A**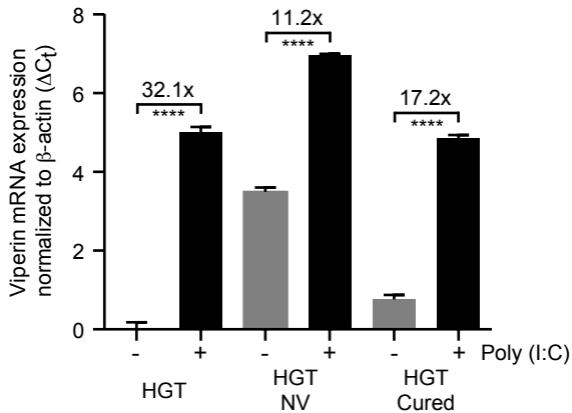**B**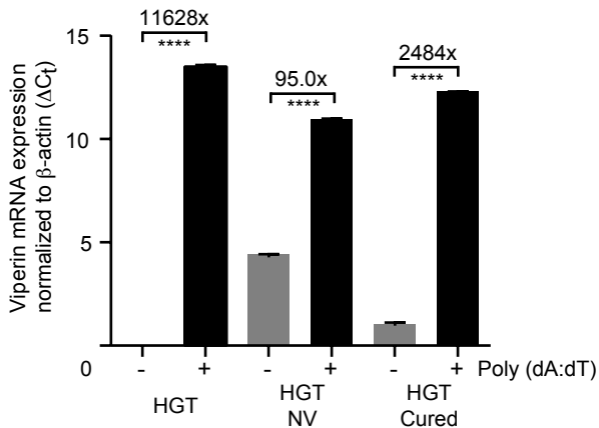



**Fig. 5****A**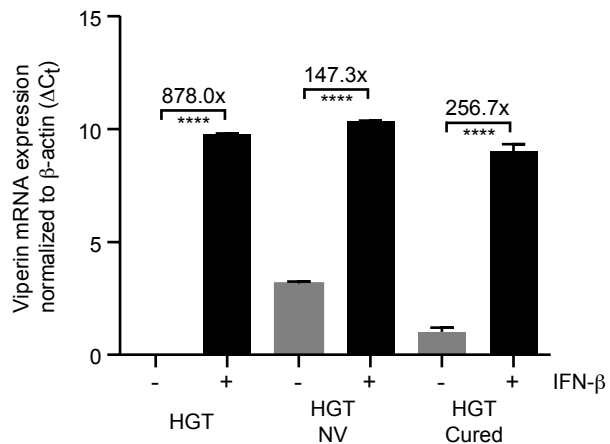**B**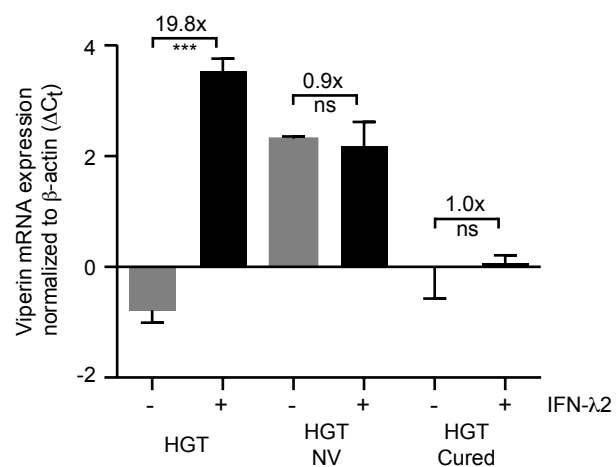**C**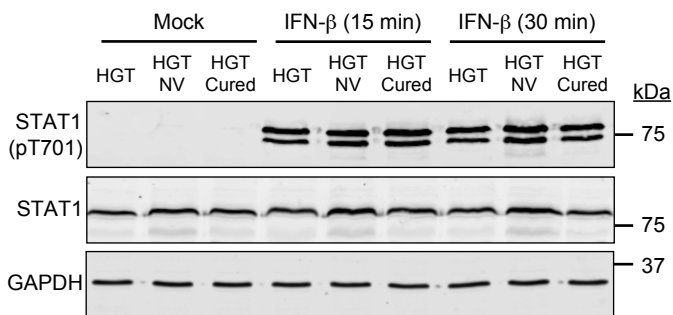**D**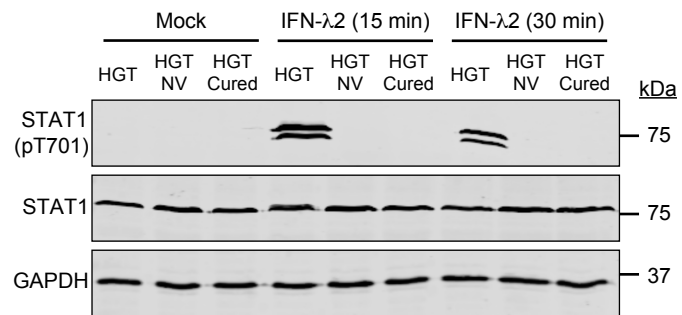**E**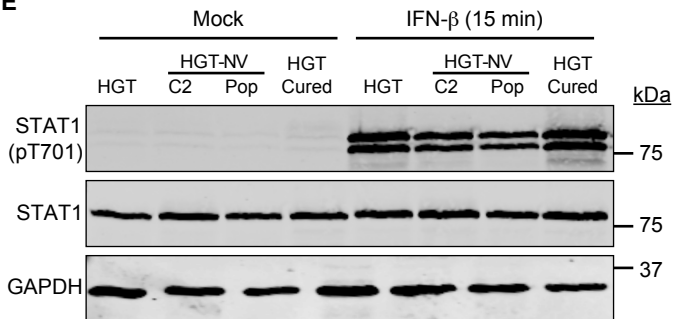**F**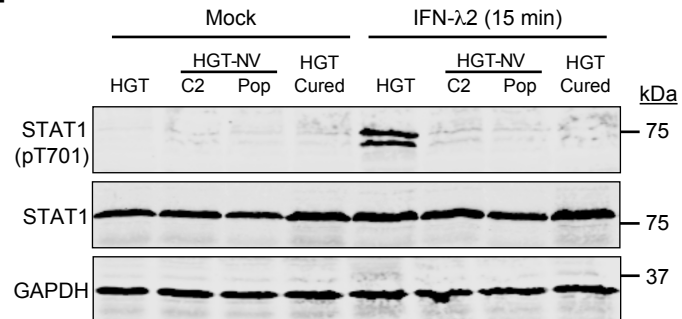



**Fig. 7**

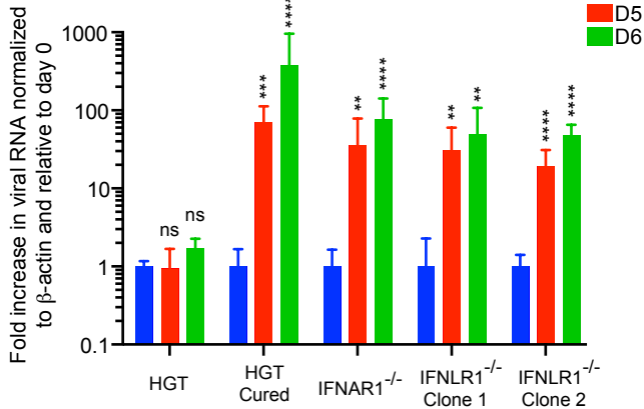

**Fig. 8**

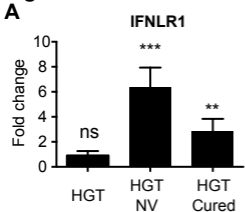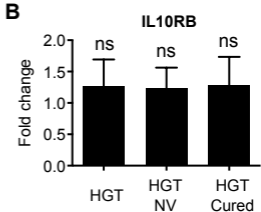

Source: https://www.biorxiv.org/content/10.1101/523282v2.full.pdf
